# Supplementary material
Source: PubMed Central journal article supplement (PMC3993367)
Supplement: JB.01281-13_zjb999093119so1.pdf [file JB.01281-13_zjb999093119so1.pdf]

**Table S1. Bacterial strains and plasmids used in this study**

| Strain or plasmid                        | Genotype or description                                        | Source or Reference |
|------------------------------------------|----------------------------------------------------------------|---------------------|
| <i>Escherichia coli</i>                  |                                                                |                     |
| BL21 Star (DE3)                          | Wild-type B, FompT hsdSB (rB- mB-) <i>gal dcm rne131</i> (DE3) | Invitrogen          |
| BL21, <i>volA</i> <sup>+</sup>           | BL21 Star (DE3), pVolA-8H, Amp <sup>R</sup>                    | Present Work        |
| <i>Vibrio cholerae</i>                   |                                                                |                     |
| C6706                                    | O1 El Tor biotype, <i>lacZ</i>                                 | (1)                 |
| C6706 $\Delta volA$                      | C6706 containing transposon insertion in <i>volA</i>           | (1)                 |
| $\Delta volA$ , pWSK29                   | C6706, pWSK29, Amp <sup>R</sup>                                | Present work        |
| $\Delta volA$ , <i>volA</i> <sup>+</sup> | C6706, pVolA, Amp <sup>R</sup>                                 | (2)                 |
| $\Delta volA$ , <i>volA</i> <sup>+</sup> | C6706, pVolA-S551A, Amp <sup>R</sup>                           | Present work        |
| $\Delta volA$ , <i>volA</i> <sup>+</sup> | C6706, pVolA-S551T, Amp <sup>R</sup>                           | Present work        |
| $\Delta volA$ , <i>pla</i> <sup>+</sup>  | C6706, pPLA, Amp <sup>R</sup>                                  | Present work        |
| <i>Aeromonas hydrophila</i> ZY01         | Wild-type                                                      | Payne Laboratory    |
| Plasmids                                 |                                                                |                     |
| pWSK29                                   | Low-copy number cloning vector, Amp <sup>R</sup>               | (3)                 |
| pVolA                                    | pWSK29 containing <i>volA</i> ,                                | (2)                 |
| pVolA-8H                                 | pWSK29 containing <i>volA</i> ,<br>C-terminal 8x histidine tag | Present work        |
| pVolA-S551A                              | pWSK29 containing <i>volA</i> , S551A mutation                 | Present work        |
| pVolA-S551T                              | pWSK29 containing <i>volA</i> , S551T mutation                 | Present work        |
| pPLA                                     | pWSK29 containing <i>pla</i> from <i>A. hydrophila</i>         | Present work        |

1. **Cameron DE, Urbach JM, Mekalanos JJ.** 2008. A defined transposon mutant library and its use in identifying motility genes in *Vibrio cholerae*. *Proceedings of the National Academy of Sciences of the United States of America* **105**:8736-8741.
2. **Pride AC, Herrera CM, Guan Z, Giles DK, Trent MS.** 2013. The Outer Surface Lipoprotein VolA Mediates Utilization of Exogenous Lipids by *Vibrio cholerae*. *mBio* **4**.
3. **Wang RF, Kushner SR.** 1991. Construction of versatile low-copy-number vectors for cloning, sequencing and gene expression in *Escherichia coli*. *Gene* **100**:195-199.

**Table S2. Oligonucleotides**

| Names   | Sequence                                                           |
|---------|--------------------------------------------------------------------|
| VolA8HF | 5' GCGCGCCATATGAAACAGGTTATTAAGCTC 3'                               |
| VolA8HR | 5' GCGCGCGGATCCTTAATGATGATGATGATGATGATGATGATGATGCTTCAAGACAGAGTT 3' |
| 551AR   | 5' GACAATCCCCCTAATGCATGTCCCAGCATACGAA 3'                           |
| 551AF   | 5' TTCGTATGCTGGGACATGCATTAGGGGGAATTGTC 3'                          |
| 551TF   | 5' GTTCGTATGCTGGGACATACGTTAGGGGGAATTGTCGGC 3'                      |
| 551TR   | 5' GCCGACAATCCCCCTAACGTATGTCCCAGCATACGAAC 3'                       |
| PLAF    | 5' GCGCGCCATATGAAAAAGAAGCTAATTTAC 3'                               |
| PLAR    | 5' GCGCGCGGATCCTTACTGCTTGAGCAGGC 3'                                |
